# Supplementary material for: STIM-mediated calcium influx regulates maintenance and selection of germinal center B cells
Source: PubMed Central journal article supplement (PMC10615893; doi:10.1084/jem.20222178), 2023-10-30
Supplement: JEM_20222178_SourceDataF6.pdf [file JEM_20222178_SourceDataF6.pdf]

**Source data Figure 6A**

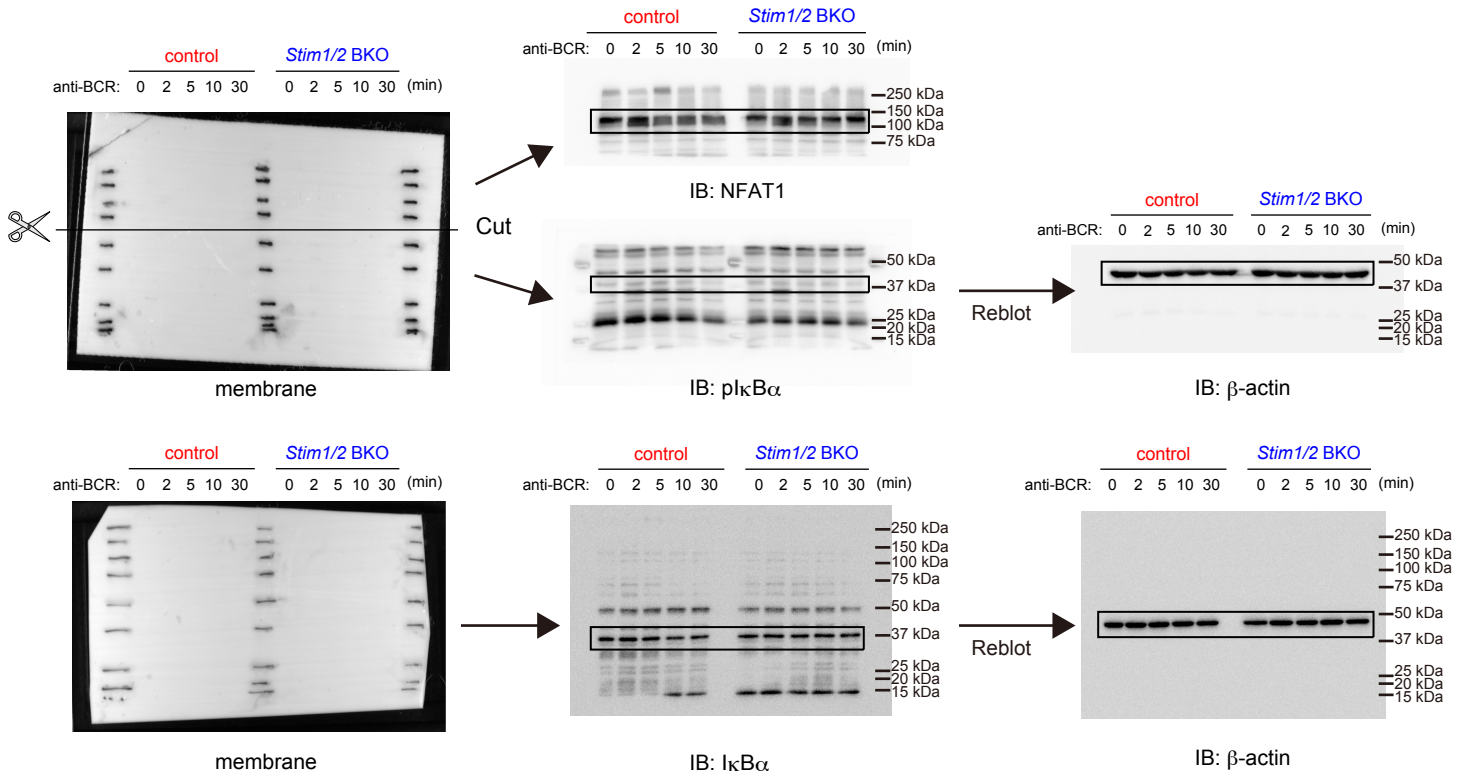

**Source data Fig.6A:**

Obtained iGB cells from control and Stim1/2 BKO were stimulated with 10  $\mu$ g/ml anti-IgM and anti-IgG to indicated time points.

Full Western blotting of NFAT1 (inactive form 140 kDa), phosphorylated IκBα (p-IκBα) (40 kDa) and total IκBα (39 kDa) were performed. β-actin (43 kDa) was assessed after reblotting the same membrane as a loading control.

The area cropped with a box were shown Figure 6A.
